# Supplementary material for: Unique Metabolic Contexts Sensitize Cancer Cells and Discriminate between Glycolytic Tumor Types
Source: MDPI journal article supplement (doi:10.3390/cancers15041158), 2023-02-11
Supplement: s1 [file s1]

A.

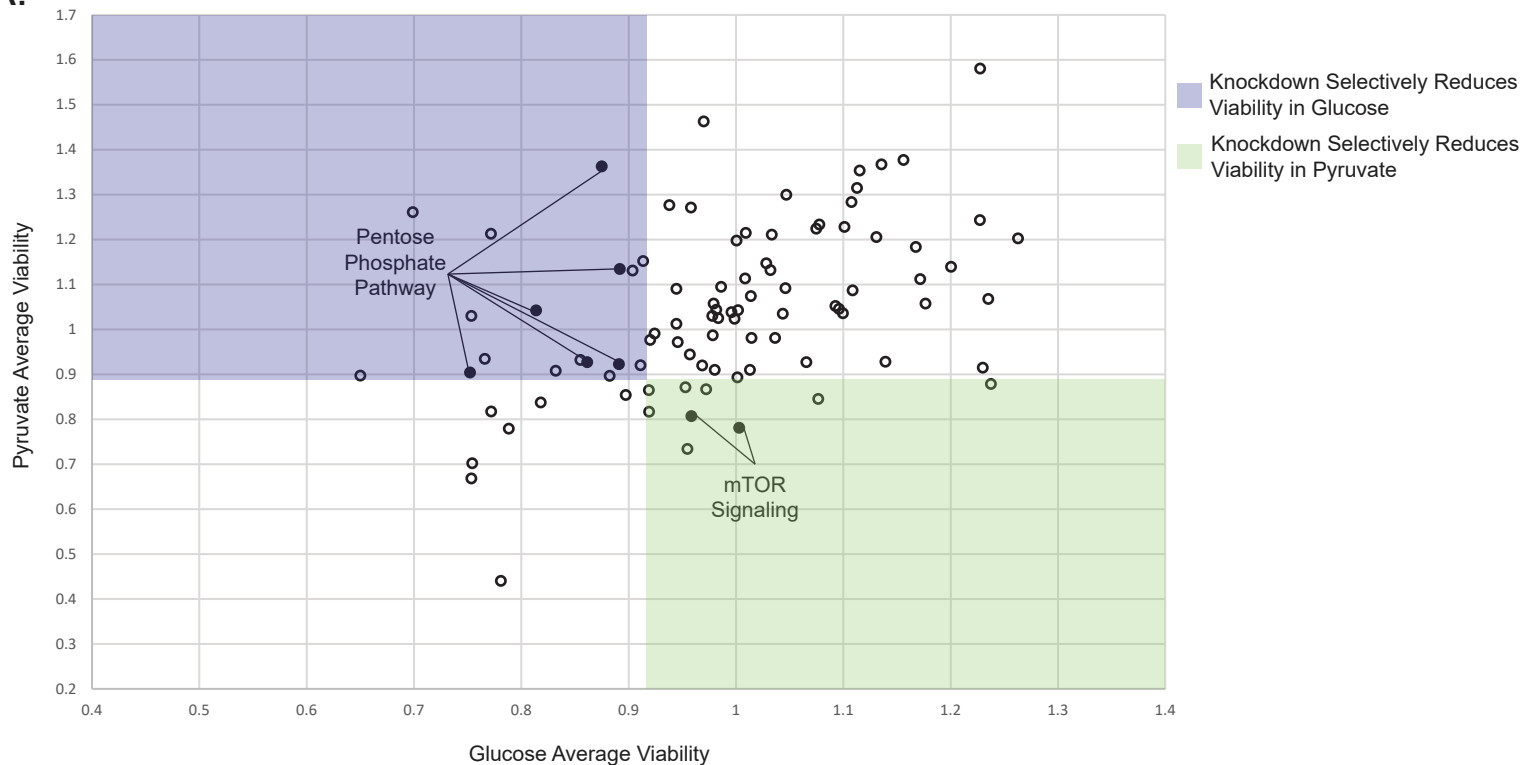

B.

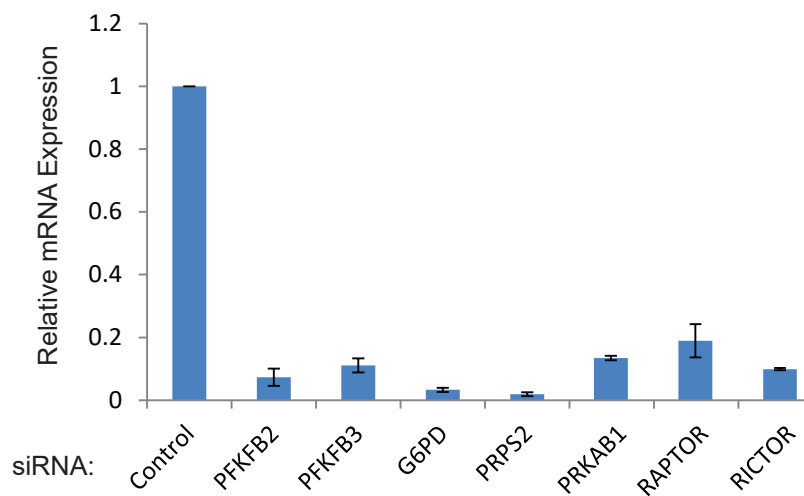

**Figure S1.** A. Comparison of differential nutrients in siRNA screen. Average viability from duplicate glucose screens (y-axis) were plotted against the average viability from duplicate pyruvate screens (x-axis). Genes whose knockdown selectively reduced viability three standard deviations from the control siRNAs are highlighted in blue (glucose screen) or green (pyruvate screen).

B. Knockdown analysis of selected siRNAs (two siRNA duplexes) from the siRNA screen. Total RNA was isolated from cells and primers were designed to specifically amplify the indicated genes.

A

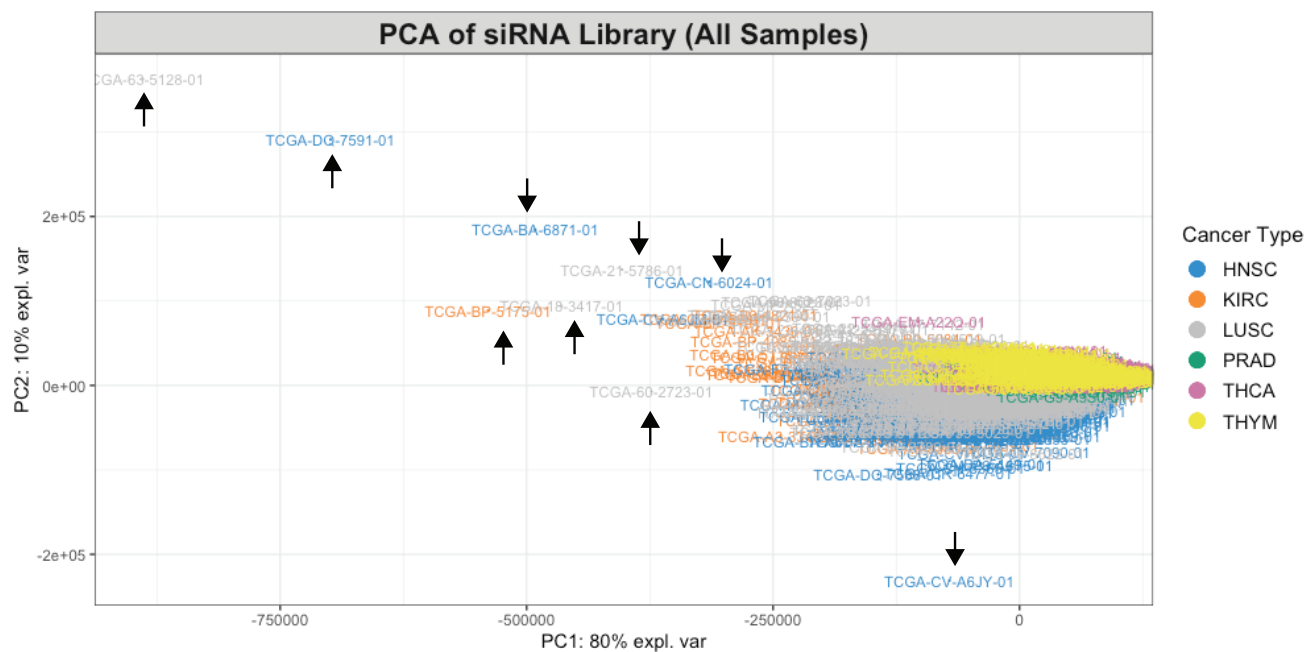

B

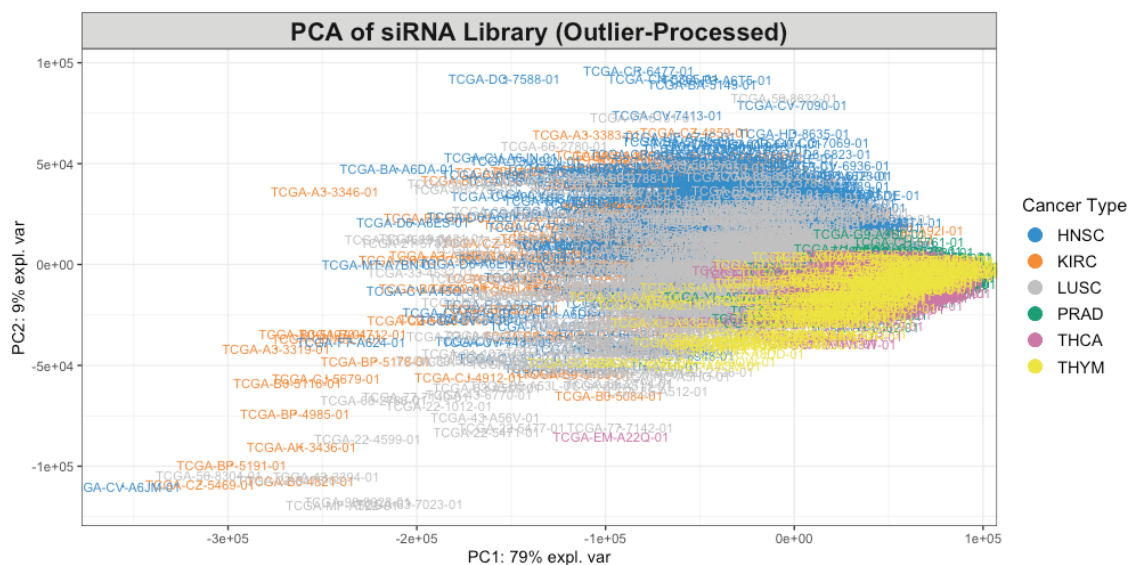

C

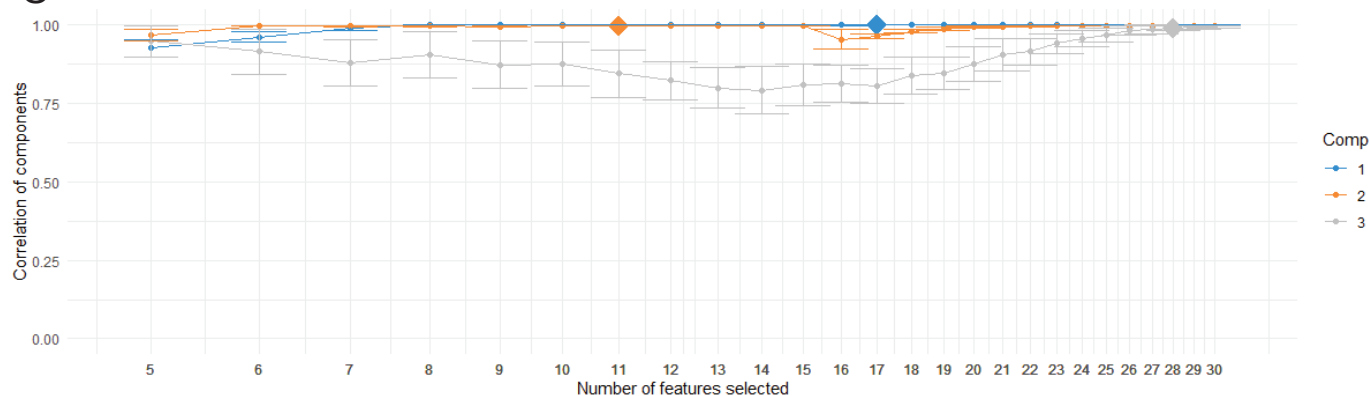

**Figure S2.** Outlier filtering and variable selection for sPCA performed on gene set RNA-seq data obtained from glycolytic (HNSC, KIRC, and LUSC) and relatively non-glycolytic (PRAD, THCA, and THYM) tumor samples. (A) Nine tumor samples were considered as outliers upon visual inspection and removed from further analysis. (B) sPCA after outlier removal. (C) Variable selection for the first three principal components.

**A.**

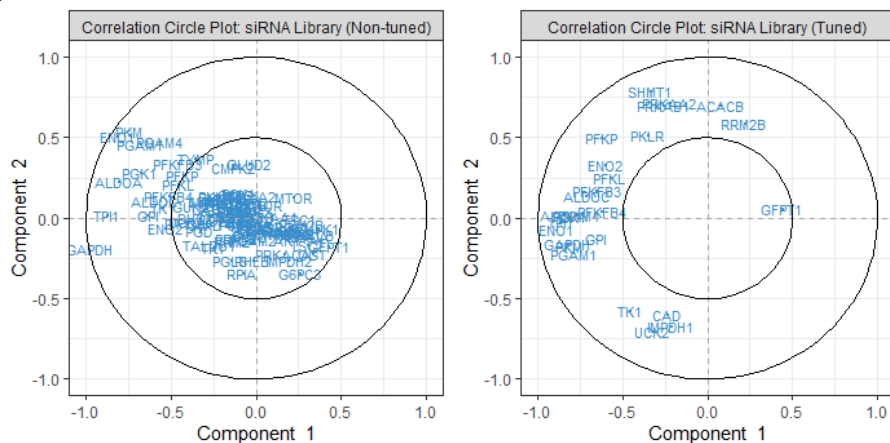

**B.**

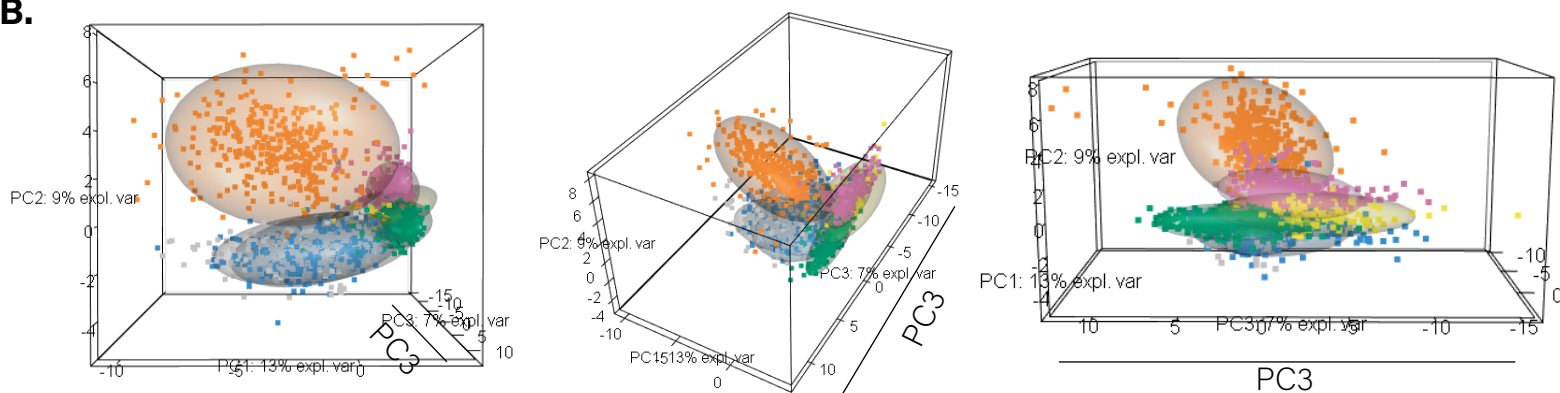

**C.**

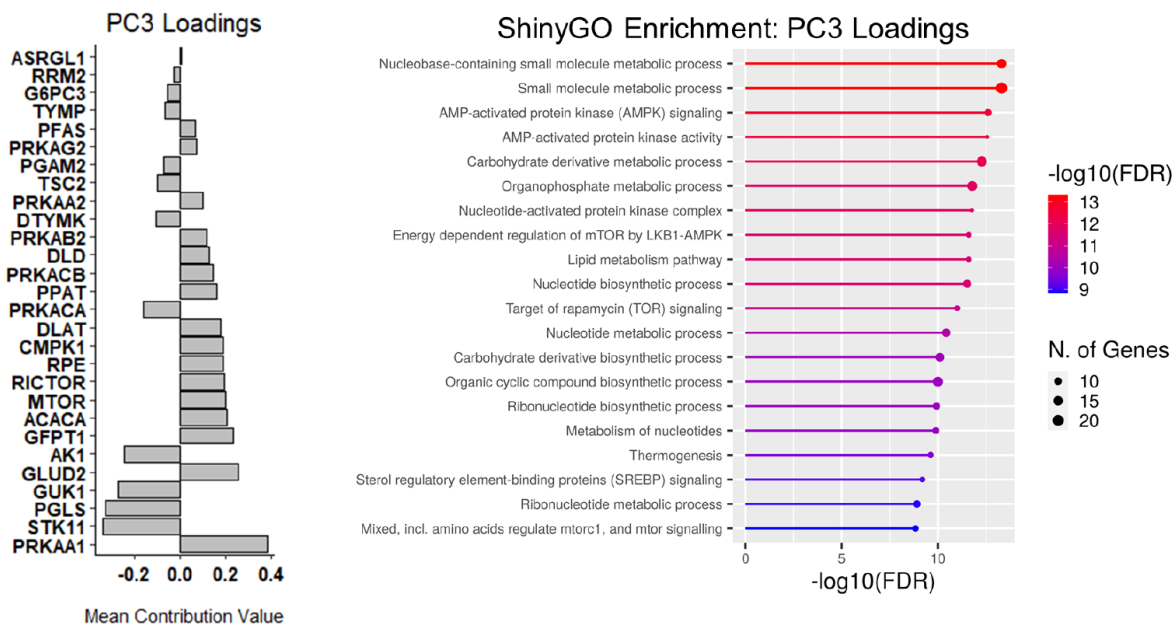

**Figure S3.** sPCA of pan-cancer gene set transcript profiles. (A) Correlation circle plot showing correlation, as standardized covariance, of each variable to a set of the first two principal components before and after variable selection. (B) Final 3D sPCA result showing unsupervised clustering in front, top, and side views along PC3. (C) PC3 loadings share a similar profile to that of PC2, and additionally contribute to enrichment of pathways related to AMPK/mTORC1 signaling.

# Pan-Cancer Transcript Expression of PC2 Loadings

A.

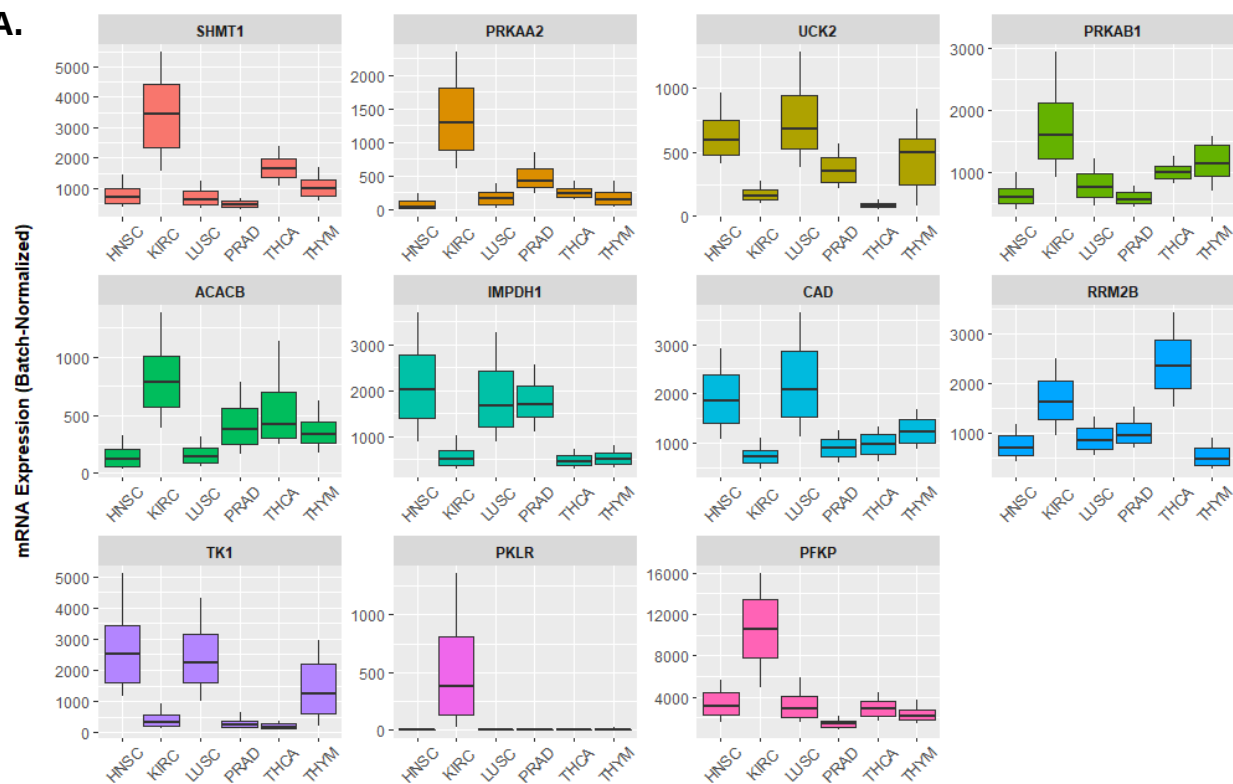

B.

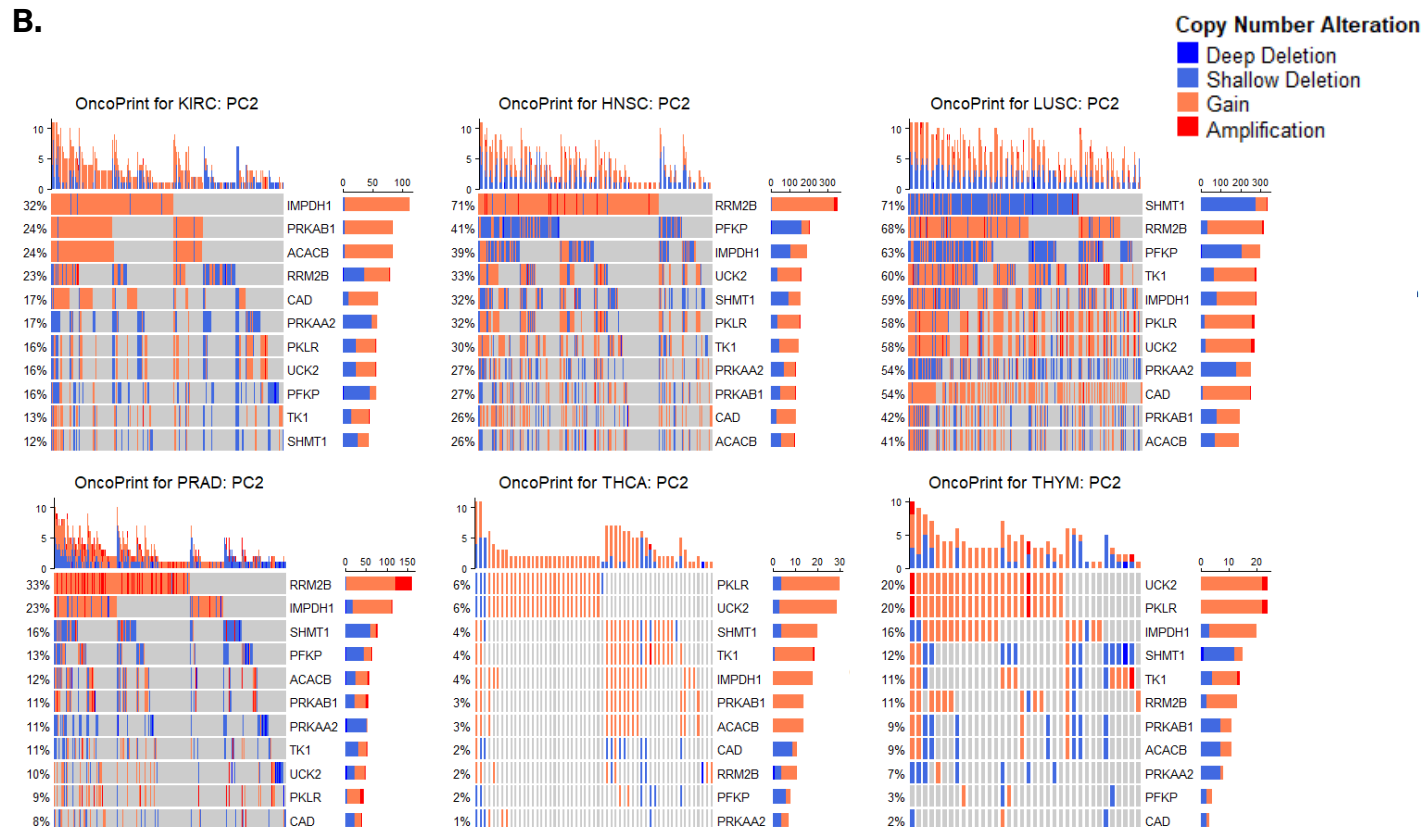

**Figure S4.** mRNA and CNA profiles for PC2 loadings across the variably glycolytic pan-cancer cohort. (A) Boxplots showing transcript expression distribution of sPCA's PC2 loadings across cancer cohorts. Due to excessive variability in bulk mRNA expression across all samples, the top and bottom 10th percentiles were excluded here. (B) Oncoprints of CNAs in PC2 loadings across the cancer cohorts.

# Pan-Cancer Transcript Expression of PC3 Loadings

**A.**

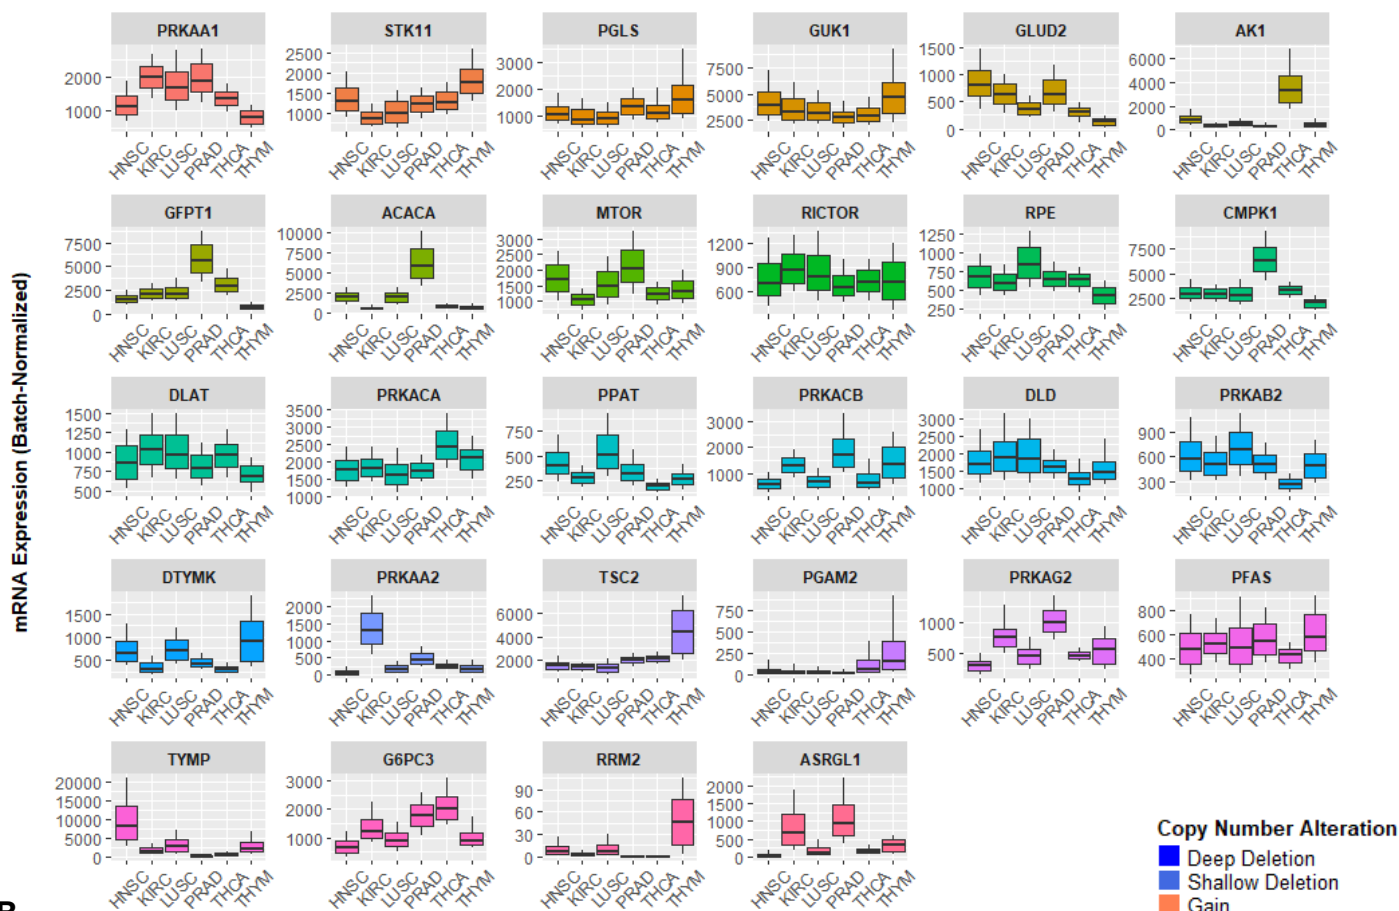

**B.**

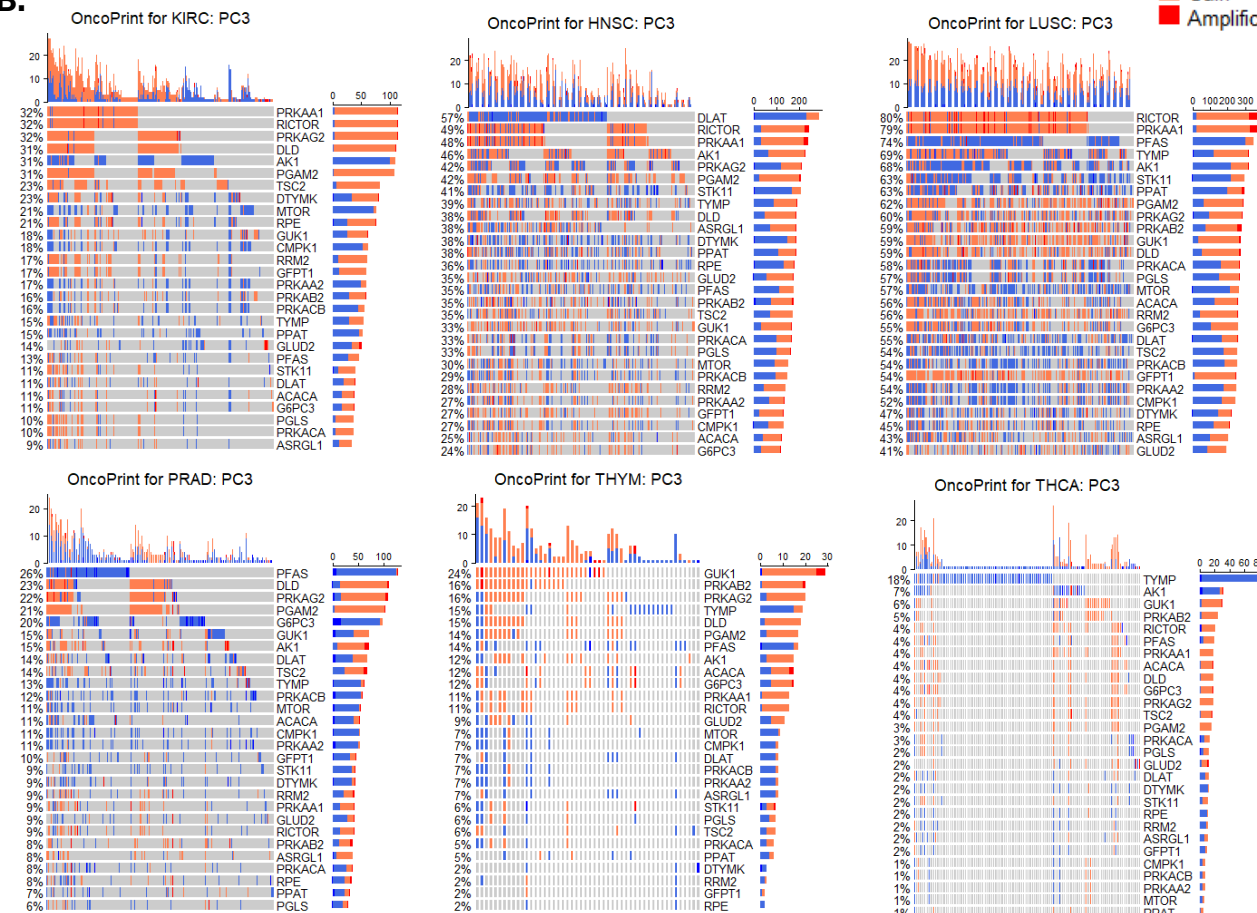

**Figure S5.** mRNA and CNA profiles for PC3 loadings across the variably glycolytic pan-cancer cohort. (A) Boxplots showing transcript expression distribution of sPCA's PC3 loadings across cancer cohorts. Due to excessive variability in bulk mRNA expression across all samples, the top and bottom 10th percentiles were excluded here. (B) Oncoprints of CNAs in PC3 loadings across the cancer cohorts.

**Table S1. List of Genes Targeted in siRNA Screen**

| Entrez Gene Id | NCBI gene symbol | Entrez Gene Id | NCBI gene symbol | Entrez Gene Id |
|----------------|------------------|----------------|------------------|----------------|
| 31             | ACACA            | 3615           | IMPDH2           | 253260         |
| 32             | ACACB            | 3948           | LDHC             | 6120           |
| 203            | AK1              | 8473           | OGT              | 22934          |
| 26289          | AK5              | 5105           | PCK1             | 6241           |
| 122481         | AK7              | 5106           | PCK2             | 50484          |
| 226            | ALDOA            | 5198           | PFAS             | 10993          |
| 229            | ALDOB            | 5207           | PFKFB1           | 6470           |
| 230            | ALDOC            | 5208           | PFKFB2           | 6794           |
| 80150          | ASRGL1           | 5209           | PFKFB3           | 6888           |
| 790            | CAD              | 5210           | PFKFB4           | 7083           |
| 129607         | CMPK2            | 5211           | PFKL             | 7086           |
| 1633           | DCK              | 5213           | PFKM             | 7167           |
| 1723           | DHODH            | 5214           | PFKP             | 7248           |
| 1737           | DLAT             | 5223           | PGAM1            | 7249           |
| 1738           | DLD              | 5224           | PGAM2            | 1890           |
| 1841           | DTYMK            | 441531         | PGAM4            | 7371           |
| 2023           | ENO1             | 5226           | PGD              |                |
| 2026           | ENO2             | 5230           | PGK1             |                |
| 2027           | ENO3             | 5232           | PGK2             |                |
| 387712         | ENO4             | 25796          | PGLS             |                |
| 2203           | FBP1             | 5313           | PKLR             |                |
| 7889           | FBP2             | 5315           | PKM2             |                |
| 2475           | FRAP1            | 5471           | PPAT             |                |
| 2538           | G6PC             | 5562           | PRKAA1           |                |
| 57818          | G6PC2            | 5563           | PRKAA2           |                |
| 92579          | G6PC3            | 5564           | PRKAB1           |                |
| 2539           | G6PD             | 5565           | PRKAB2           |                |
| 2597           | GAPDH            | 5566           | PRKACA           |                |
| 2645           | GCK              | 5567           | PRKACB           |                |
| 2673           | GFPT1            | 5568           | PRKACG           |                |
| 2747           | GLUD2            | 51422          | PRKAG2           |                |
| 2752           | GLUL             | 51422          | PRKAG2           |                |
| 2805           | GOT1             | 53632          | PRKAG3           |                |
| 2806           | GOT2             | 5631           | PRPS1            |                |
| 2821           | GPI              | 5634           | PRPS2            |                |
| 2987           | GUK1             | 57521          | RPTOR            |                |
| 9563           | H6PD             | 6009           | RHEB             |                |

# NCBI gene symbol

RICTOR

RPE

RPIA

RRM2

RRM2B

SDS

SHMT1

STK11

TALDO1

TK1

TKT

TPI1

TSC1

TSC2

TYMP

UCK2

Table S2. Pan-cancer patient demographics for gene set sPCA.

| Cancer | Samples | Race Category |        |       |       |       |          |
|--------|---------|---------------|--------|-------|-------|-------|----------|
|        |         | Male          | Female | White | Black | Asian | NA/Other |
| KIRC   | 512     | 326           | 186    | 442   | 55    | 8     | 7        |
| HNSC   | 523     | 382           | 141    | 448   | 47    | 11    | 17       |
| LUSC   | 487     | 358           | 127    | 337   | 29    | 9     | 112      |
| PRAD   | 494     | 494           | 0      | 147   | 7     | 2     | 338      |
| THCA   | 500     | 134           | 365    | 328   | 27    | 52    | 92       |
| THYM   | 123     | 64            | 59     | 102   | 6     | 13    | 2        |
